# Supplementary material for: Phenological responses to climate change based on a hundred years of herbarium collections of tropical Melastomataceae
Source: PLoS One. 2021 May 7;16(5):e0251360. doi: 10.1371/journal.pone.0251360 (PMC8104365; doi:10.1371/journal.pone.0251360)
Supplement: S4 Table — (XLSX) [file pone.0251360.s007.xlsx]

## Sheet: Planilha1
Species	Phenophase	N	Intercept (SE)	t-value	p-value	Precipitation (0)			Average temperature (0)			Temperature range (0)			Photoperiod (0)			Precipitation (1)			Average temperature (1)			Temperature range (1)			Photoperiod (1)			Precipitation (2)			Average temperature (2)			Temperature range (2)			Photoperiod (2)			Precipitation (3)			Average temperature (3)			Temperature range (3)
						slope (SE)	t-value	p-value	slope (SE)	t-value	p-value	slope (SE)	t-value	p-value	slope (SE)	t-value	p-value	slope (SE)	t-value	p-value	slope (SE)	t-value	p-value	slope (SE)	t-value	p-value	slope (SE)	t-value	p-value	slope (SE)	t-value	p-value	slope (SE)	t-value	p-value	slope (SE)	t-value	p-value	slope (SE)	t-value	p-value	slope (SE)	t-value	p-value	slope (SE)	t-value	p-value	slope (SE)	t-value
Pleroma clavatum	Flowering	94	-65.187 (10.453)	-6.236	0	-	-	-	-	-	-	-	-	-	0.281 (0.035)	8.114	0	-	-	-	-0.028 (0.013)	-2.128	0.036	-	-	-	-0.322 (0.04)	-7.957	0	-	-	-	0.033 (0.013)	2.595	0.011	-	-	-	-	-	-	-	-	-	-	-	-	0.014 (0.006)	2.584
	Fruiting	67	-67.444 (11.912)	-5.662	0	-	-	-	-	-	-	-	-	-	0.298 (0.038)	7.748	0	-	-	-	-	-	-	-	-	-	-0.344 (0.045)	-7.702	0	-	-	-	-	-	-	-	-	-	-	-	-	-	-	-	-	-	-	-	-
Pleroma trichopodum	Flowering	127	-67.057 (8.744)	-7.669	0	-	-	-	-	-	-	-0.019 (0.01)	-1.957	0.053	0.351 (0.034)	10.233	0	-	-	-	-	-	-	-	-	-	-0.49 (0.066)	-7.453	0	0.003 (0.001)	2.597	0.011	-	-	-	-	-	-	0.148 (0.06)	2.454	0.016	-0.003 (0.001)	-3.128	0.002	-	-	-	-	-
	Fruiting	128	-63.426 (8.301)	-7.641	0	-	-	-	-	-	-	-0.017 (0.009)	-2.01	0.047	0.325 (0.032)	10.155	0	-	-	-	-	-	-	0.015 (0.009)	1.651	0.101	-0.446 (0.06)	-7.458	0	0.003 (0.001)	2.892	0.005	0.012 (0.007)	1.736	0.085	-	-	-	0.121 (0.055)	2.21	0.029	-0.003 (0.001)	-2.968	0.004	-	-	-	-	-
[truncated: 7 more columns]
